# Supplementary material for: Exome Sequencing Identifies Genetic Variants Associated with Circulating Lipid Levels in Mexican Americans: The Insulin Resistance Atherosclerosis Family Study (IRASFS)
Source: Sci Rep. 2018 Apr 4;8:5603. doi: 10.1038/s41598-018-23727-2 (PMC5884862; doi:10.1038/s41598-018-23727-2)

## **Supplementary Data**

### **Exome Sequencing Identifies Genetic Variants Associated with Circulating Lipid Levels in Mexican Americans: The Insulin Resistance Atherosclerosis Family Study (IRASFS)**

Chuan Gao, Keri L. Tabb, Latchezar M. Dimitrov, Kent D. Taylor, Nan Wang, Xiuqing Guo, Jirong Long, Jerome I. Rotter, Richard M. Watanabe, Joanne E. Curran, John Blangero, Carl D. Langefeld, Donald W. Bowden, Nicholette D. Palmer

## Supplementary Figure Legends

**Figure S1. Distribution of minor allele frequencies among analyzed variants.**

**Figure S2. Results from the maximum likelihood estimation of individual ancestries as implemented in ADMIXTURE.** Unsupervised clustering was conducted for Mexican American participants from IRASFS (gray) with inclusion of representative HapMap samples: CEPH (red), YRI (blue), CHN (green), and MEX (orange).

**Figure S3. QQ-plot of results from the association analysis. a. HDL, b. LDL, c. TC, d. TG.** Variants included had a minor allele count (MAC)  $\geq 5$ .

**Figure S4. Regional plot of the *APOA5* locus in IRASFS.** a) association with TG adjusted for age, sex, BMI, and recruitment center b) association with TG adjusted for age, sex, BMI, recruitment center and rs964184. Genotyped SNPs passing quality control measures are plotted with their Discovery p-values (as  $-\log_{10}$  values) as a function of genomic position (hg19). In each panel, the index variant is represented by a purple diamond. Color of additional variants indicates correlation with the index SNP (red,  $r^2 \geq 0.80$ ; orange,  $0.60 \leq r^2 < 0.80$ ; green,  $0.40 \leq r^2 < 0.60$ ; blue,  $0.20 \leq r^2 < 0.40$ ; white,  $r^2 < 0.20$ ; gray no  $r^2$  value available) based on pairwise  $r^2$  values from HapMap. Estimated recombination rates (taken from HapMap) are plotted to reflect the local LD structure. Gene annotations were taken from the University of California Santa Cruz genome browser.

**Figure S5. Location of rs2072560 in *APOA5* among ENCODE data.** Four human primary hepatocytes RNA sequencing results were plotted using the UCSC genome browser. The four liver biopsy samples included were derived from four European individuals: GSM2072386 (20-week female), GSM2072387 (22-week male), GSM2072372 (32-year male), and GSM2072373 (6-year female).

**Figure S6. Location of SNP chr4:157997598 within a ZNF263 binding site.** ENCODE ChIP-seq results are plotted using the UCSC genome browser.

**Supplementary Table Legends (Tables attached as .xlsx file)**

**Table S1. Heritability estimates for lipid traits in the IRASFS cohort.**

**Table S2. Nominally associated ( $P \leq 1.00E-04$ ) and linked signals ( $LOD \geq 2.0$ ) for lipid traits from the IRASFS cohort.**

**Table S3. Burden testing among IRASFS WES data with lipid traits.**

**Table S4. SNPs with a LOD score of greater than or equal to 3 with lipid traits in IRASFS.**

**Table S5. Meta-analysis results for 58 SNPs evaluated for replication with lipid traits.**

**Table S6. Fine-mapping of previously reported lipid loci in IRASFS conditioned on the index variant.**

Figure S1.

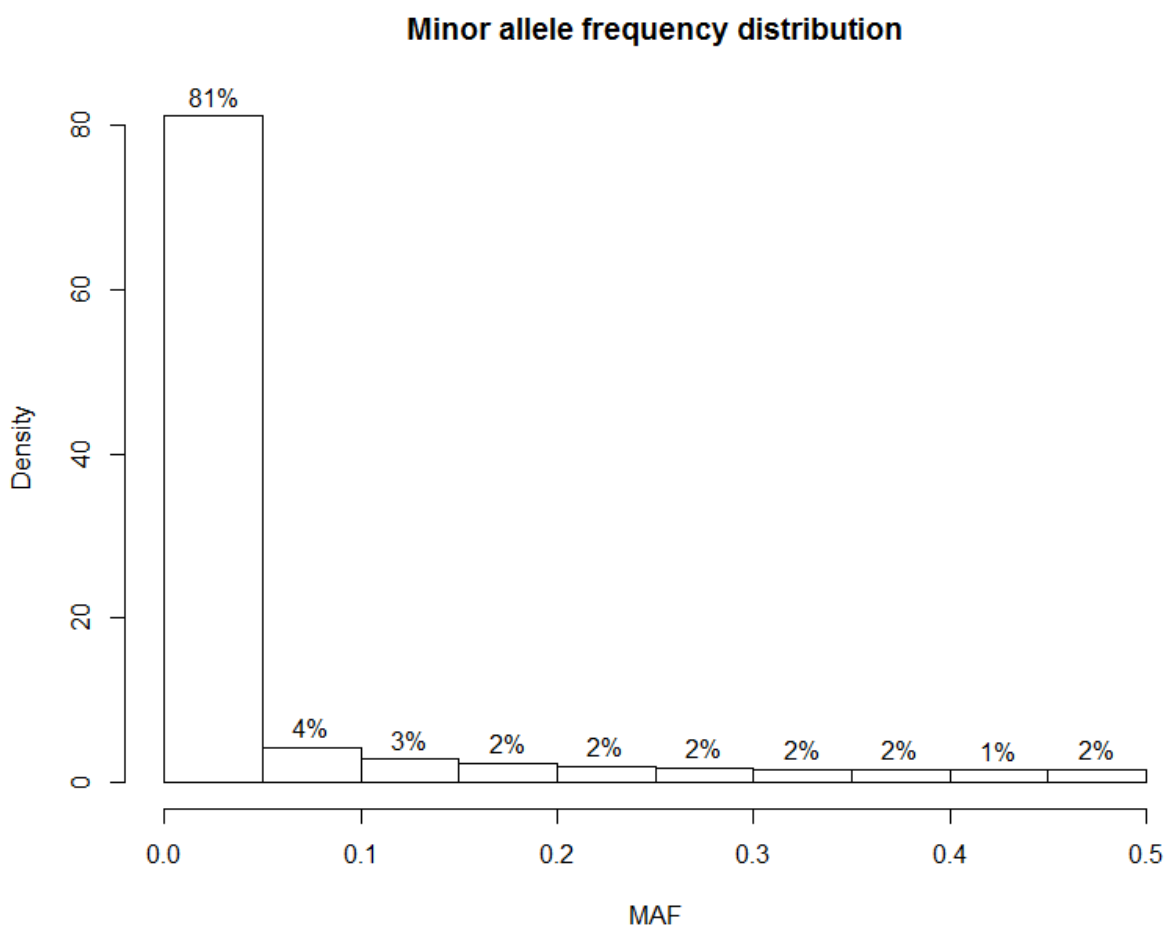

Figure S2.

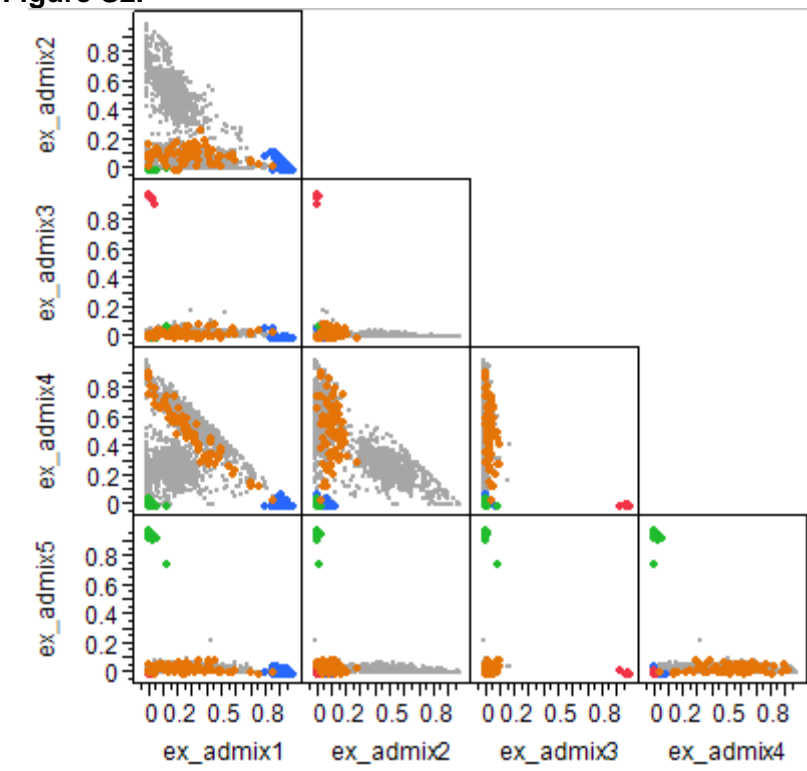

Figure S3.

A. Q-Q plot for loghdl p-values

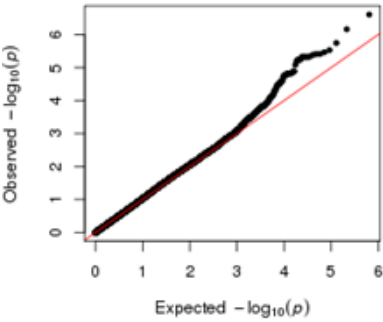

B. Q-Q plot for sqrtidl p-values

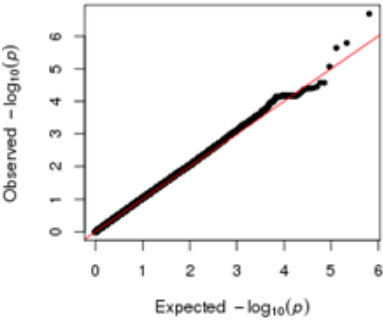

C. Q-Q plot for logchol p-values

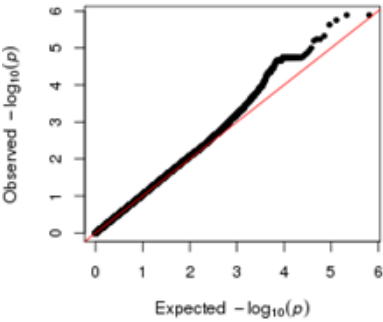

D. Q-Q plot for logtrigs p-values

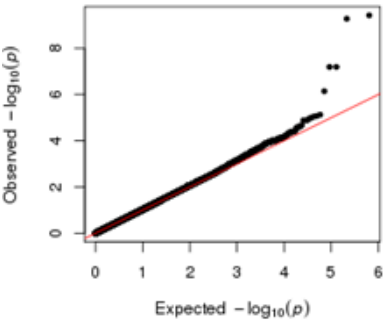

Figure S4.

A.

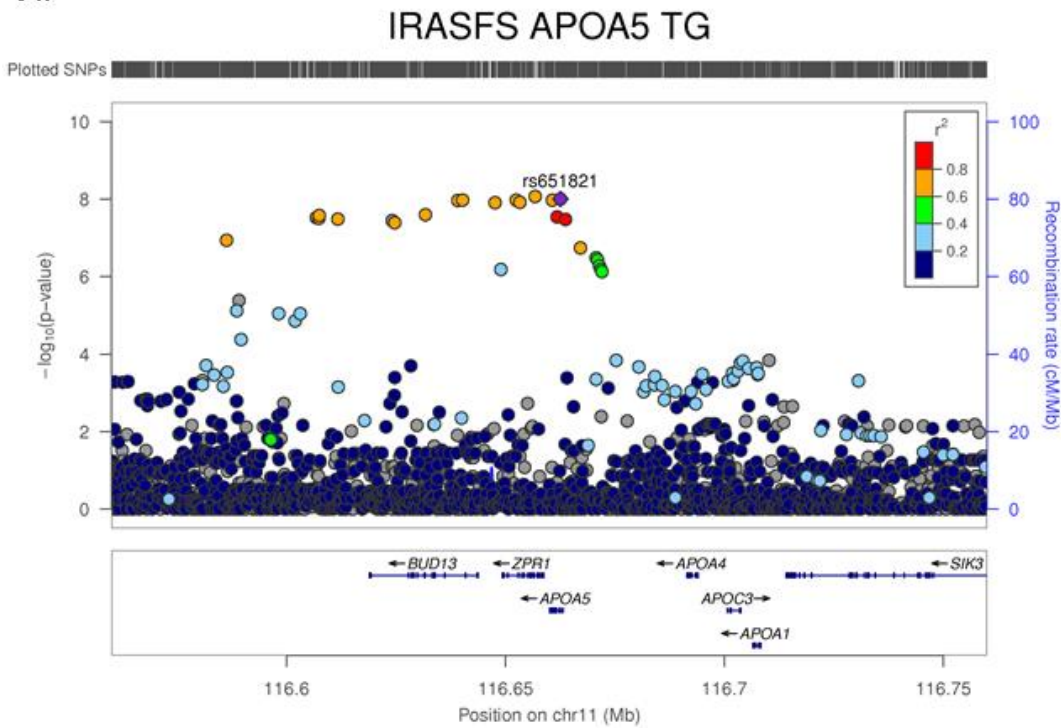

B.

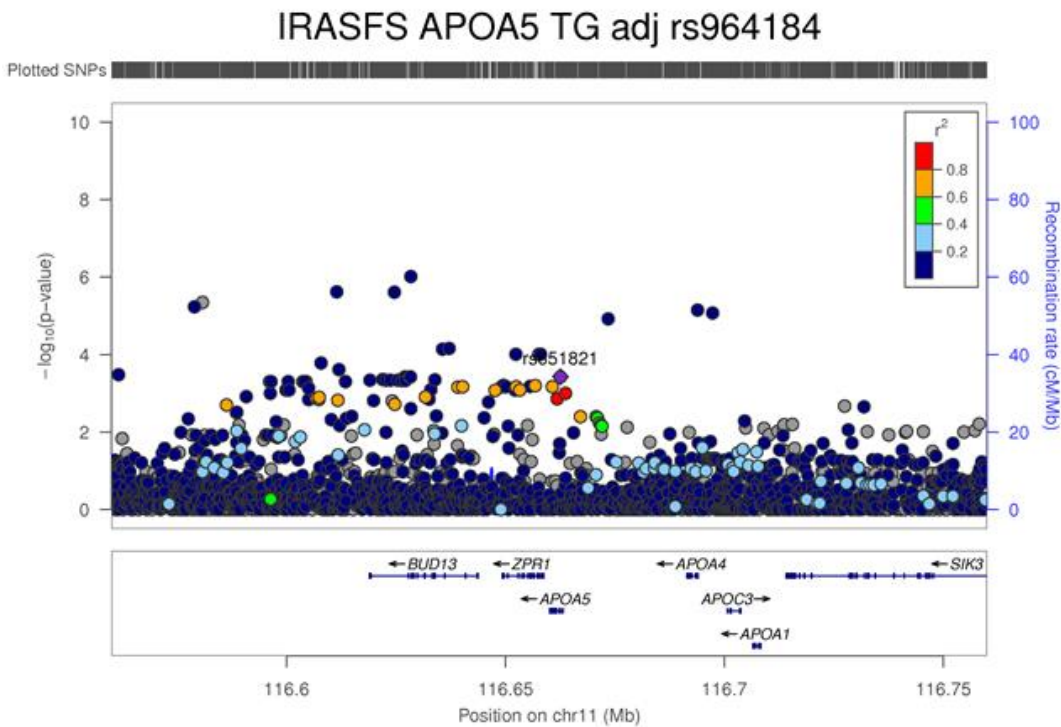

Figure S5.

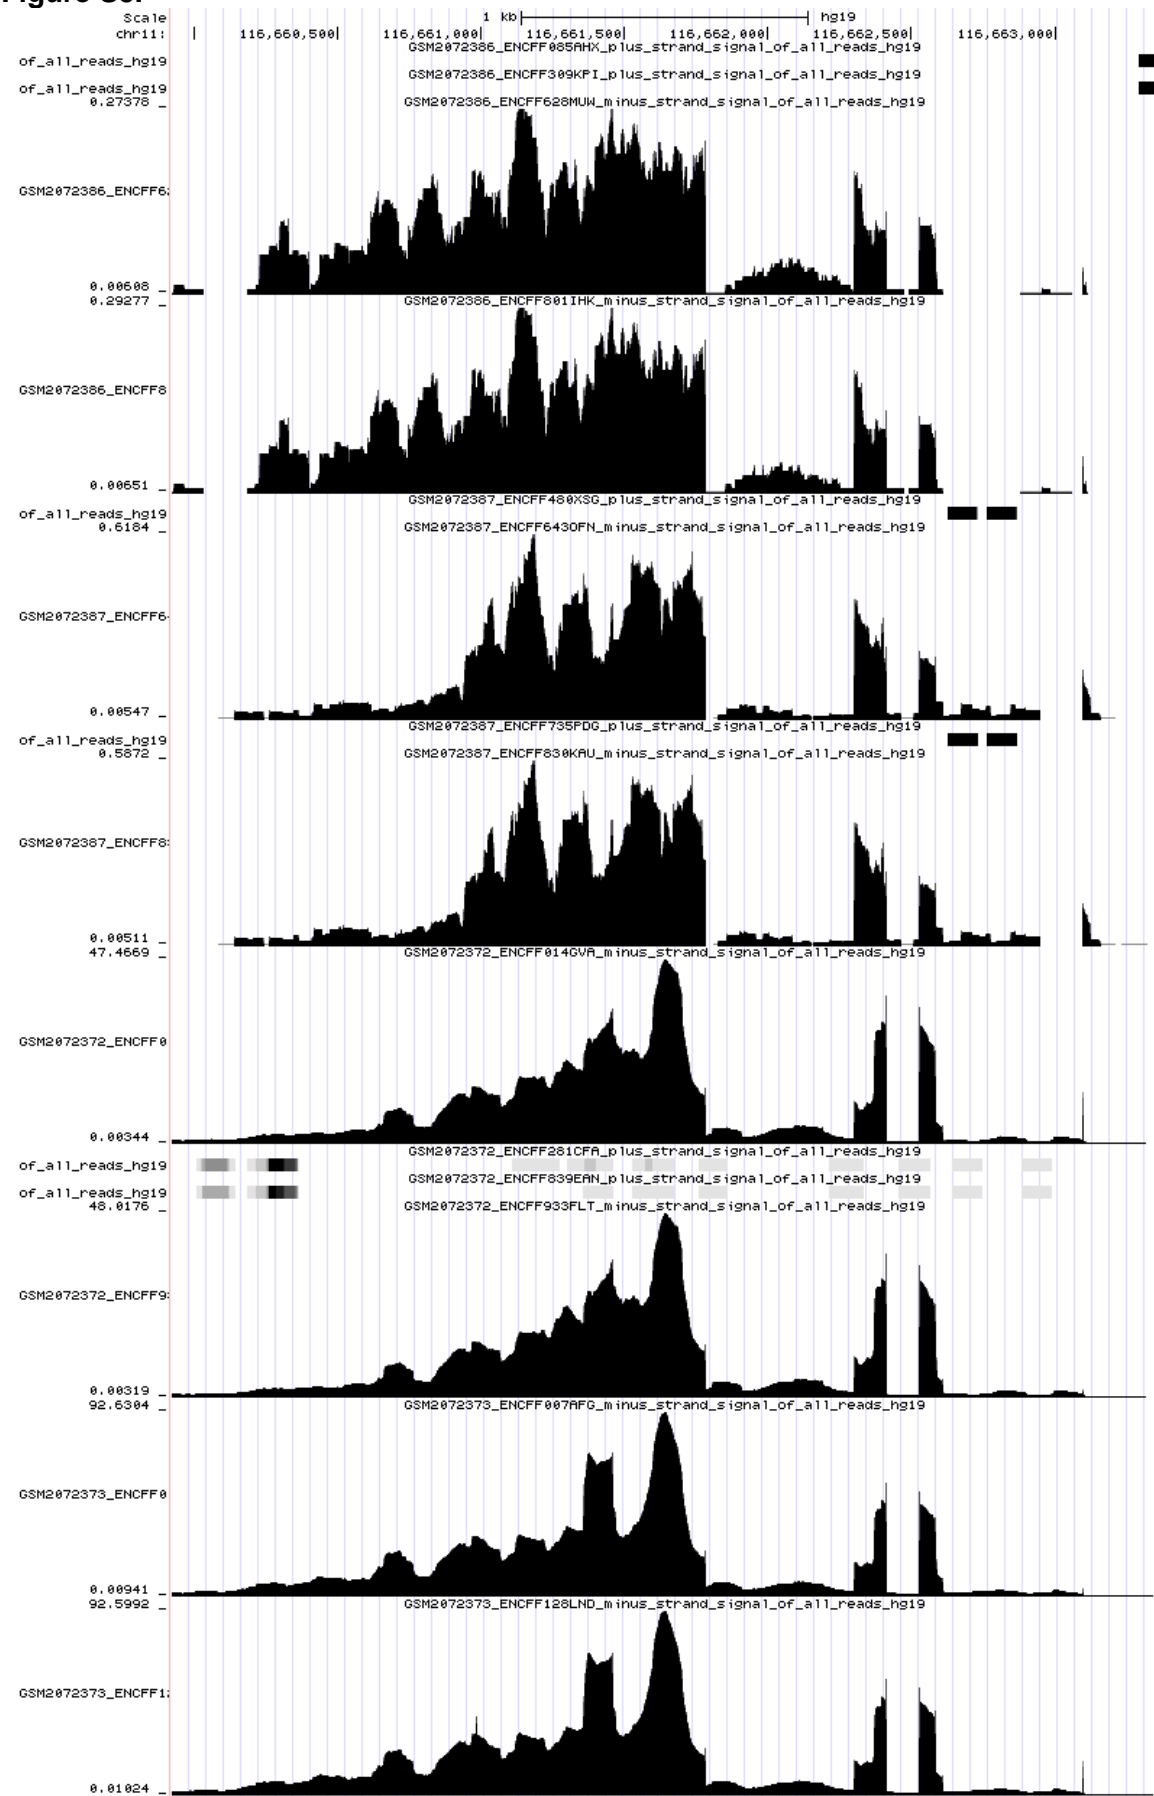

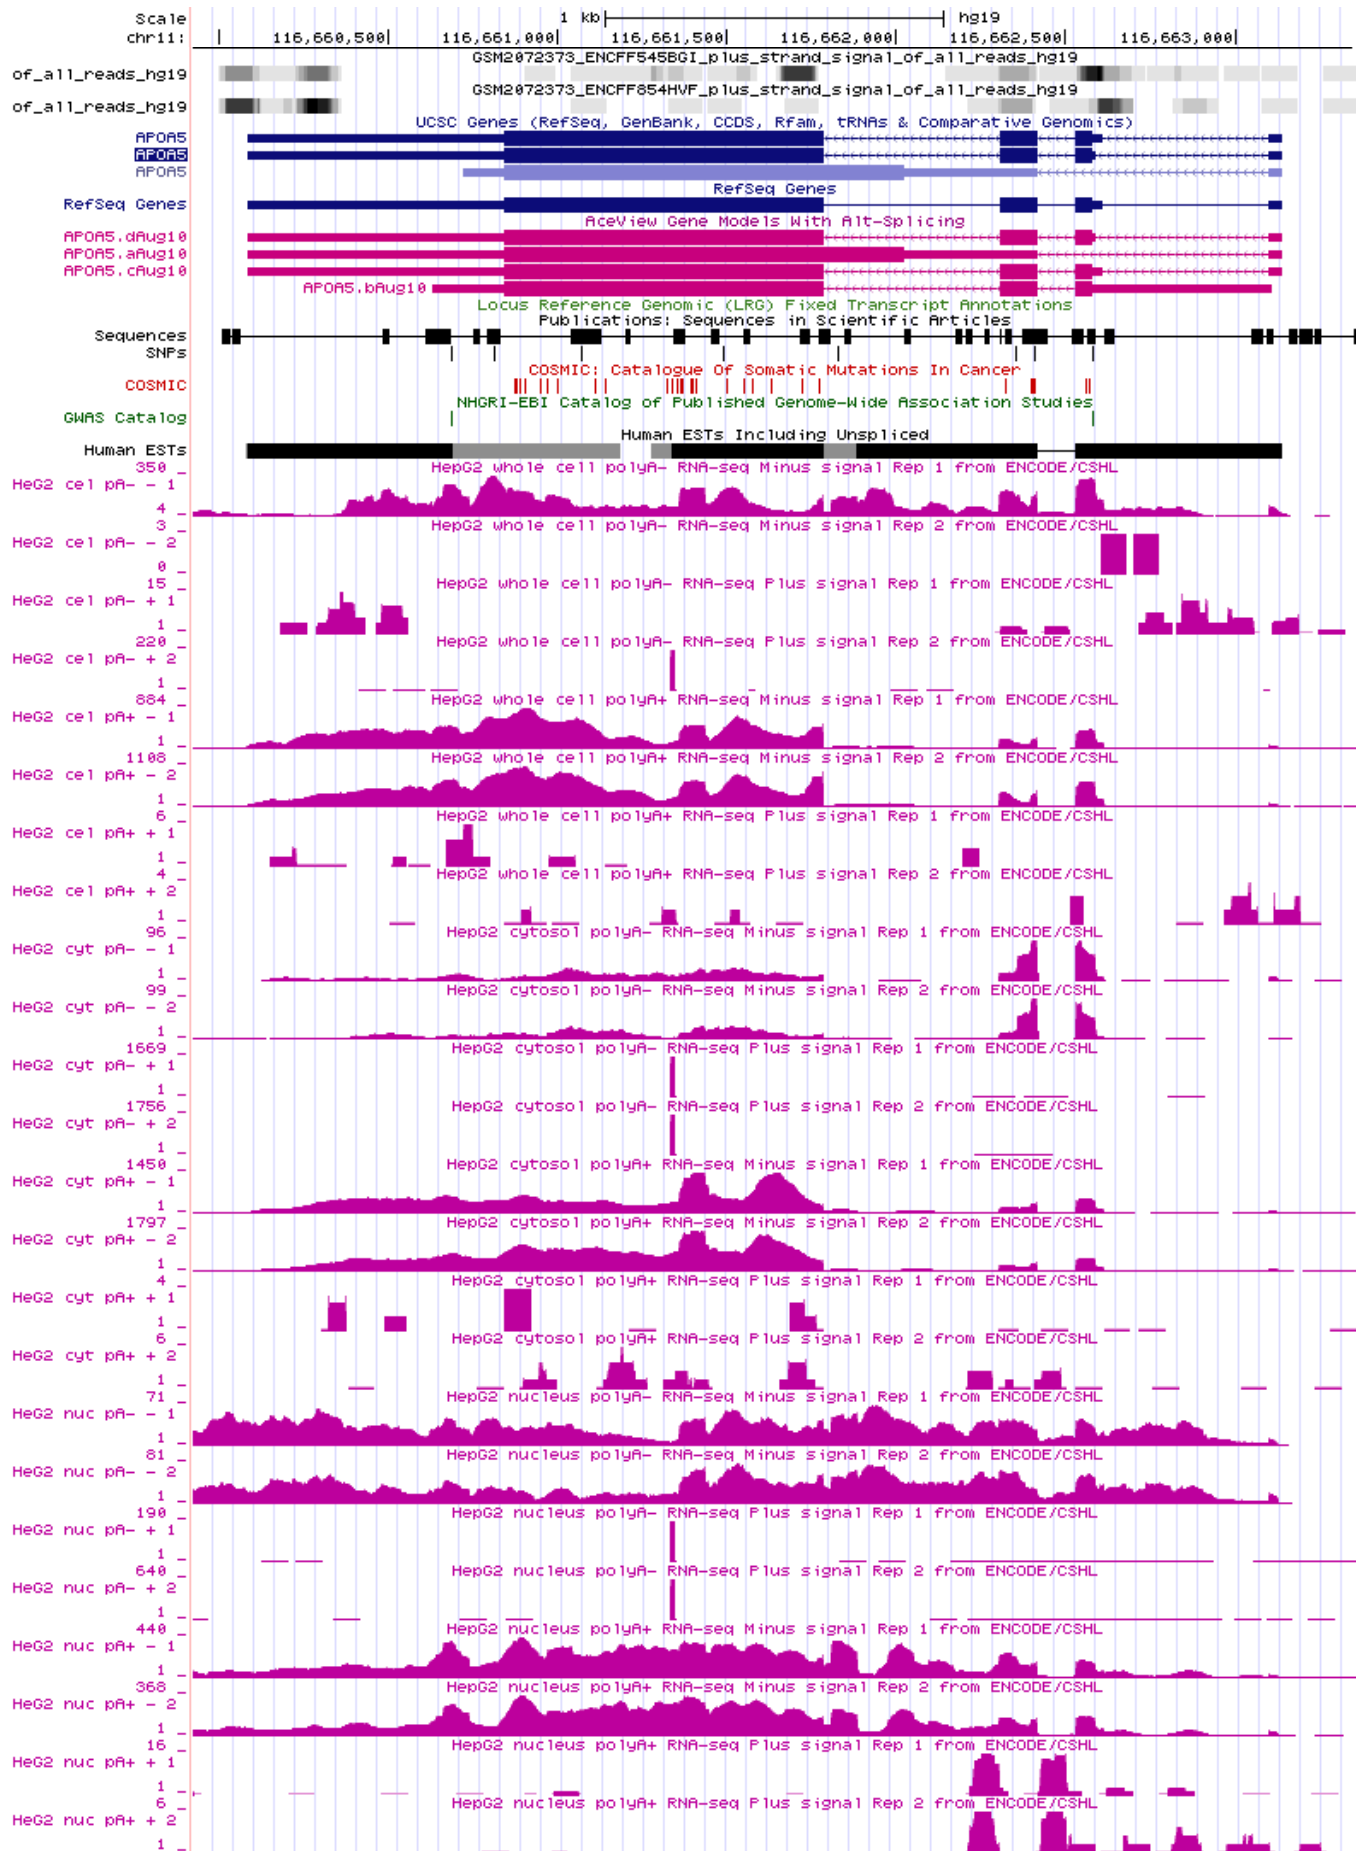

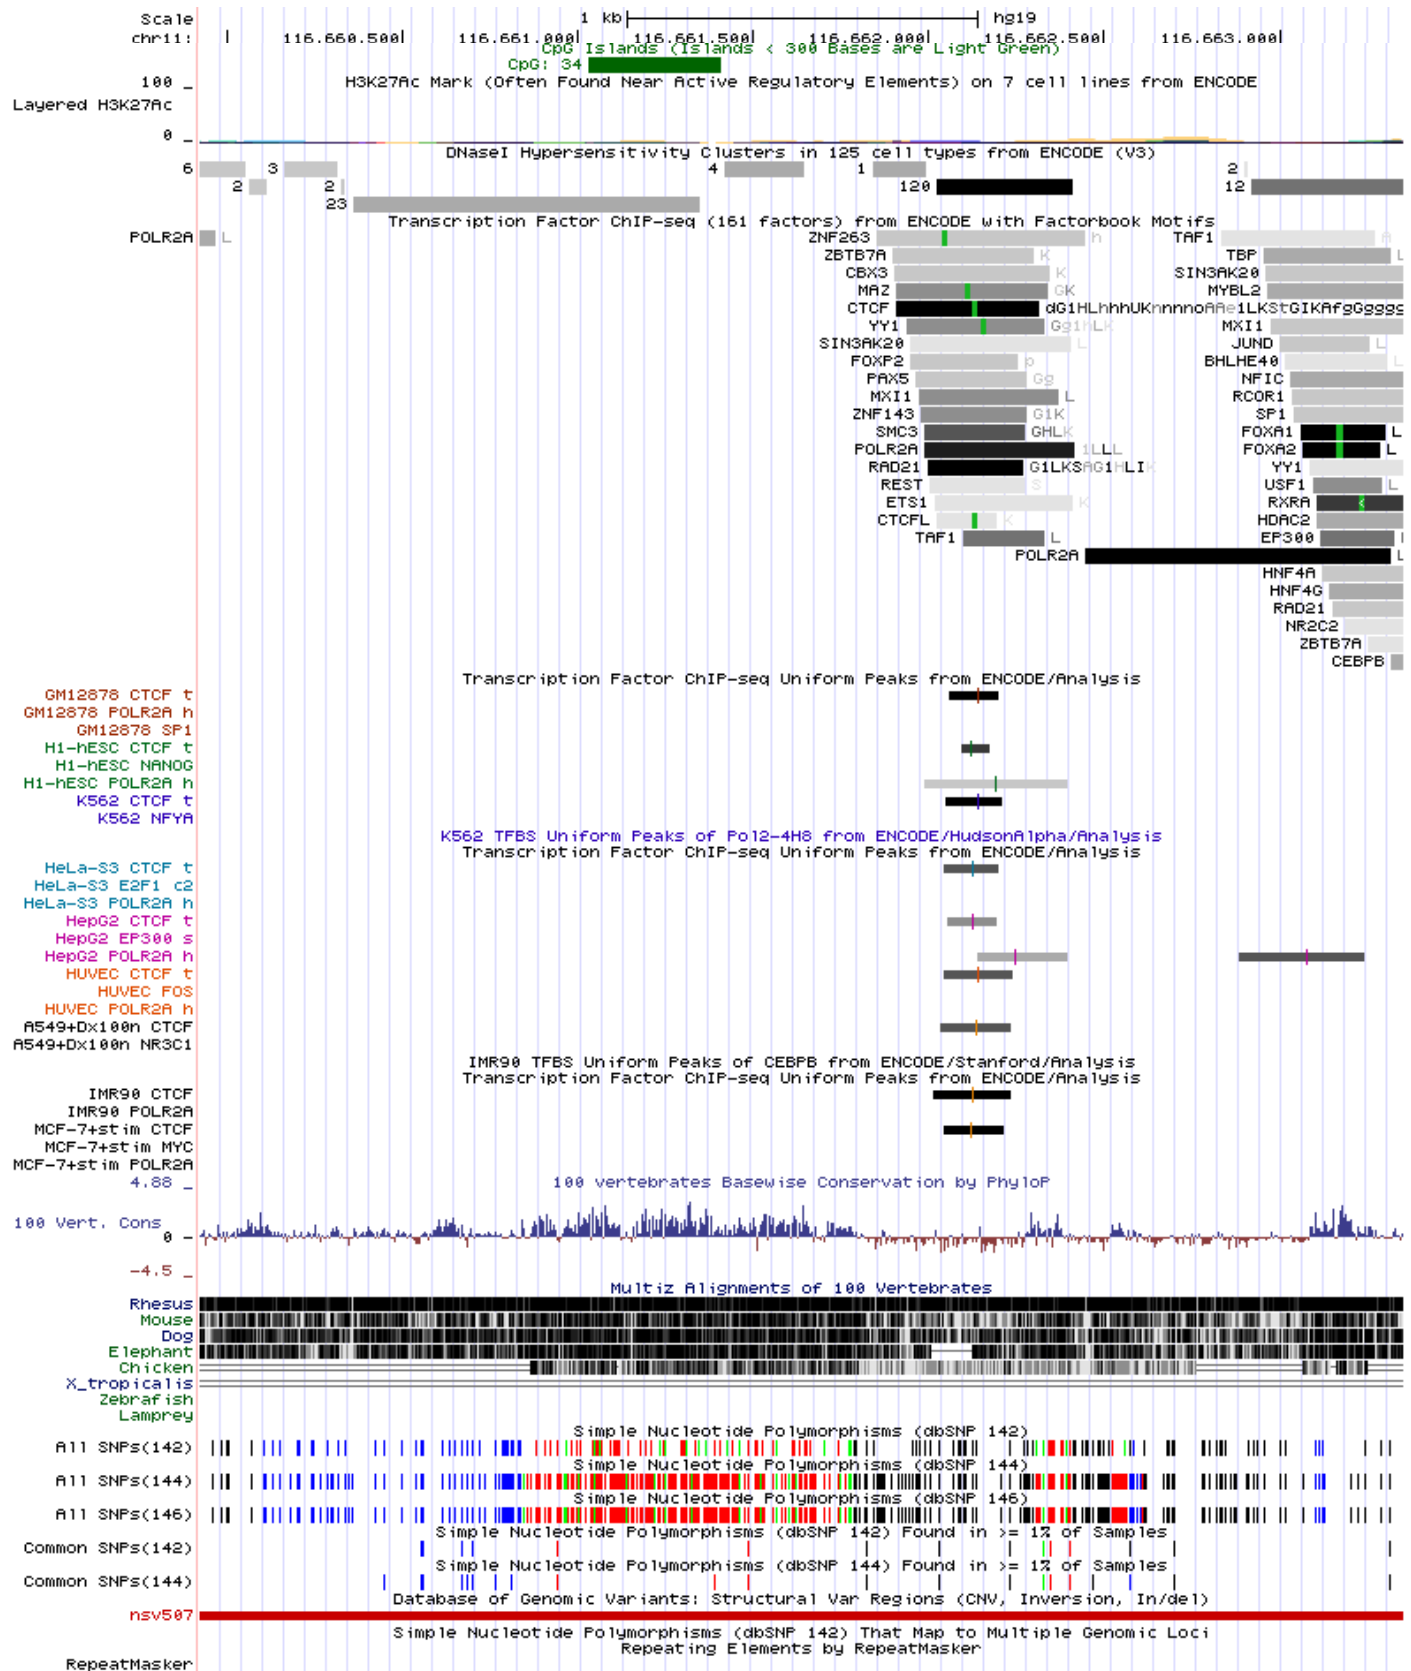

Figure S6.

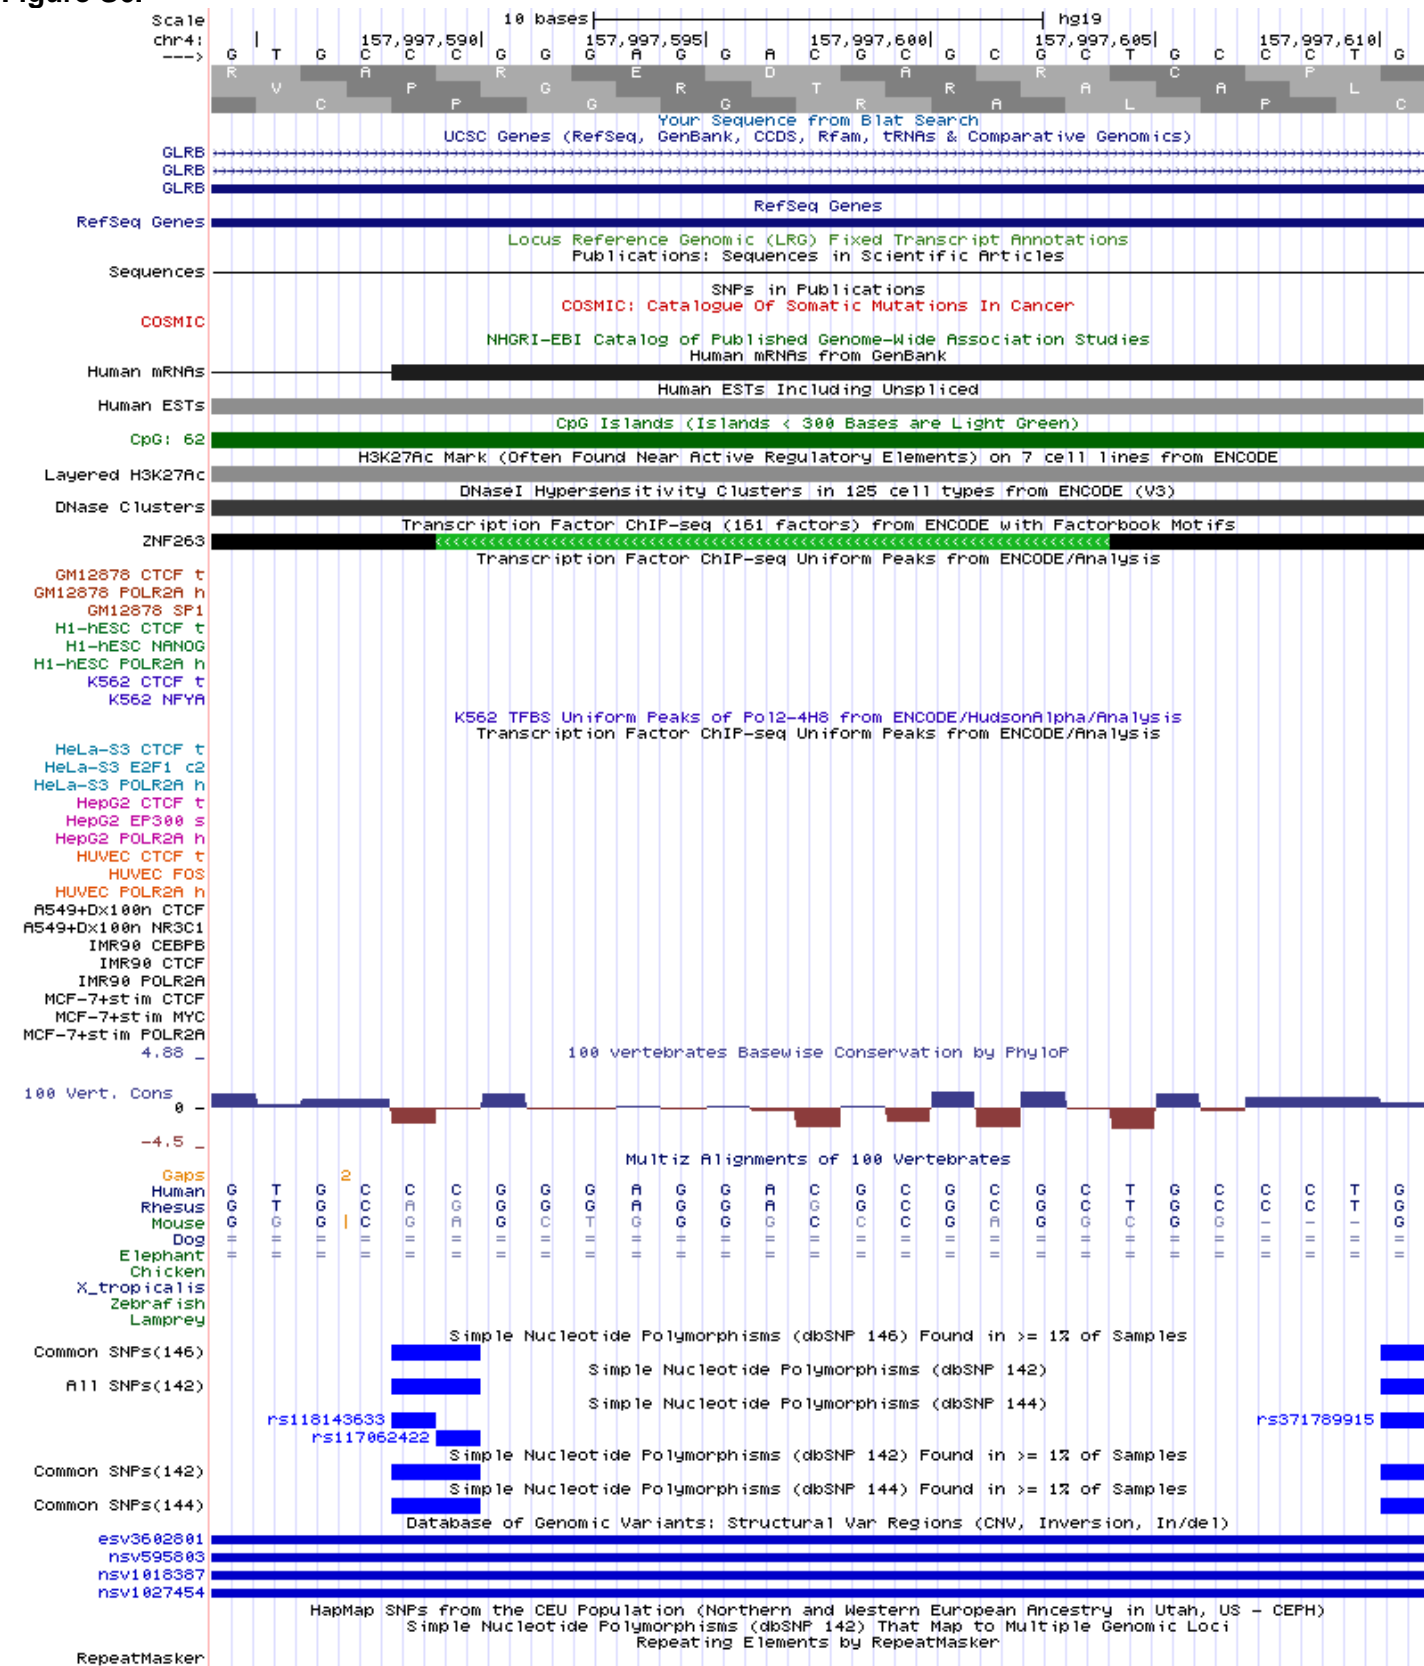

Supplement: Supplementary file 1 — Supplement [file 41598_2018_23727_MOESM1_ESM.pdf]
